# Comparative genomic analysis of *Cristatella mucedo* provides insights into *Bryozoan* evolution and nervous system function

Viktor V Starunov<sup>1,2†</sup>, Alexander V Predeus<sup>3†\*</sup>, Yury A Barbitoff<sup>3</sup>, Vladimir A Kutiumov<sup>1</sup>, Arina L Maltseva<sup>1</sup>, Ekatherina A Vodiasova<sup>4</sup>, Andrea B Kohn<sup>5</sup>, Leonid L Moroz<sup>5\*</sup>, Andrew N Ostrovsky<sup>1,6\*</sup>

<sup>1</sup> Department of Invertebrate Zoology, Faculty of Biology, Saint Petersburg State University, Universitetskaya nab. 7/9, 199034, St. Petersburg, Russia

<sup>2</sup> Zoological Institute, Russian Academy of Sciences, Universitetskaya nab. 1, 199034, St. Petersburg, Russia

<sup>3</sup> Bioinformatics Institute, Kantemirovskaya 2A, 197342, St. Petersburg, Russia

<sup>4</sup> A.O. Kovalevsky Institute of Biology of the Southern Seas, Russian Academy of Sciences, Leninsky pr. 38/3, 119991, Moscow, Russia

<sup>5</sup> The Whitney Laboratory for Marine Bioscience, University of Florida, 9505 Ocean Shore Blvd, St Augustine, FL 32080, USA

<sup>6</sup> Department of Paleontology, Faculty of Earth Sciences, Geography and Astronomy, University of Vienna, Althanstrasse 14, 1090, Vienna, Austria

† These authors contributed equally to the study.

\* To whom correspondence should be addressed: [predeus@bioinf.me](mailto:predeus@bioinf.me), [moroz@whitney.ufl.edu](mailto:moroz@whitney.ufl.edu), [a.ostrovsky@spbu.ru](mailto:a.ostrovsky@spbu.ru)

This manuscript has been withdrawn by the authors as it was submitted without the full consent of all the authors.

Therefore, the authors do not wish this work to be cited as reference for the project. If you have any questions, please contact the corresponding author.
